# Supplementary material
Source: PubMed Central journal article supplement (PMC3322994)
Supplement: supp_M111.318758_jbc.M111.318758-1.pdf [file supp_M111.318758_jbc.M111.318758-1.pdf]

Supplementary Data

Regulation of the Human Plasminogen Activator Inhibitor Type 2 (PAI-2) Gene: Cooperation of an Upstream Silencer and Transactivator

**Brett Stringer, Ekemini A. Udofa, and Toni M. Antalis**

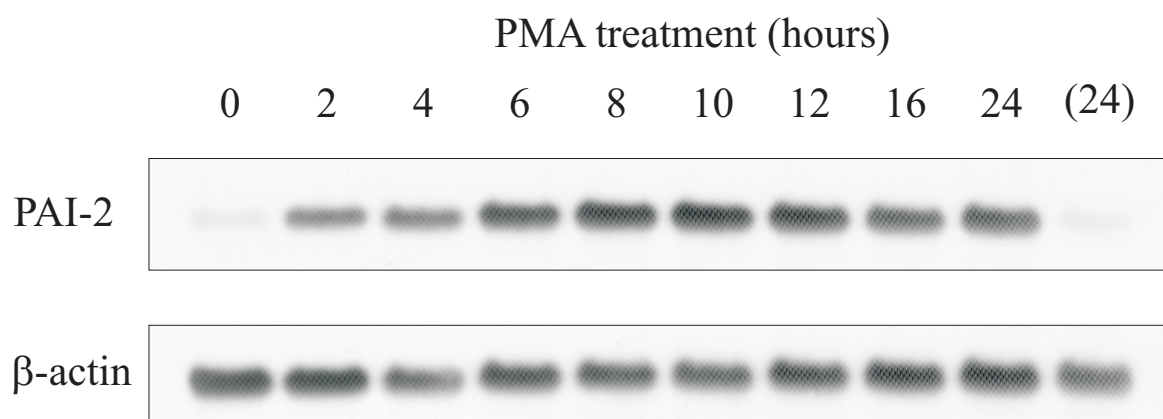

**FIGURE S1. PAI-2 mRNA expression is up-regulated in U937 cells in response to PMA.** Total RNA was isolated from  $1 \times 10^7$  U937 cells treated for the indicated times with 40 ng/ml PMA. Twenty micrograms of total RNA per lane was analyzed by Northern blot using  $^{32}$ P-labeled human PAI-2 cDNA and  $^{32}$ P-labeled human  $\beta$ -actin cDNA.

**A.**

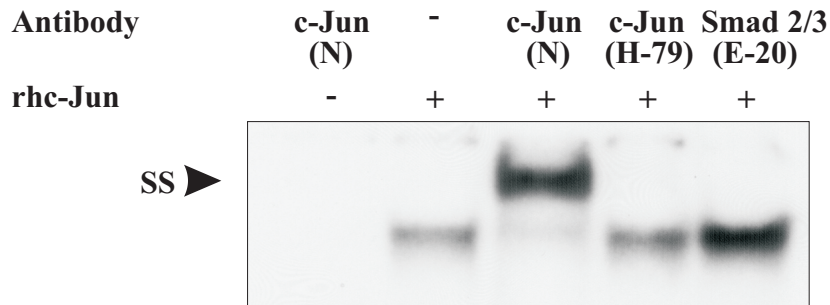

**B.**

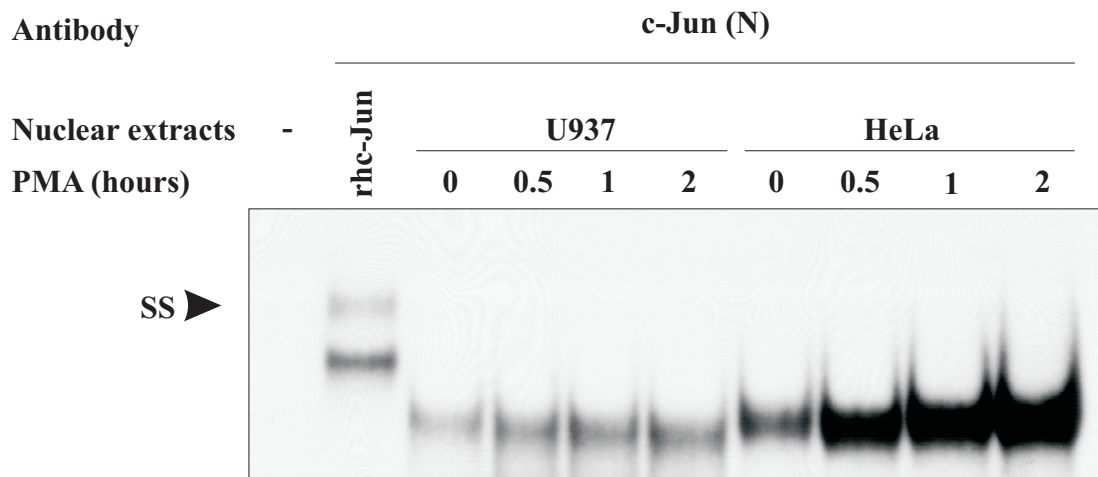

**FIGURE S2. c-Jun does not bind to the transactivator AP-1 site in nuclear extracts prepared from untreated or PMA-treated U937 or HeLa cells.** (A) Supershift assays were performed with recombinant human c-Jun (rhc-Jun) (Promega) and a  $^{32}$ P-labeled double stranded oligonucleotide probe representing the human PAI-2 promoter transactivator region -4952/-4932. Labeled probe was incubated with 0.64  $\mu$ g of rhc-Jun and 0.1  $\mu$ g of poly(dI-dC) for 20 minutes at room temperature. rhc-Jun was pre-incubated with 4  $\mu$ g of antibody for 2 hours on ice. The antibodies used for supershift assays with rhc-Jun were anti-c-Jun (N), anti-c-Jun (H-79) or anti-Smad 2/3 (E-20). (B) Supershift assays with nuclear extracts prepared from U937 cells or HeLa cells cultured in the presence of 40 ng/ml PMA for the indicated times were performed similarly, except 5  $\mu$ g of nuclear extracts was incubated with 2  $\mu$ g of poly (dI-dC). Supershifted (SS) complexes are indicated with arrows.
